# Supplementary material for: Effects of electrochemical properties of ferrocenylpyrazolylnickel(ii) and palladium(ii) compounds on their catalytic activities in ethylene oligomerisation reactions
Source: Royal Society of Chemistry journal article supplement (doi:10.1039/c7ra13588b), 2018-01-01
Supplement: c7ra13588b1.pdf [file c7ra13588b1.pdf]

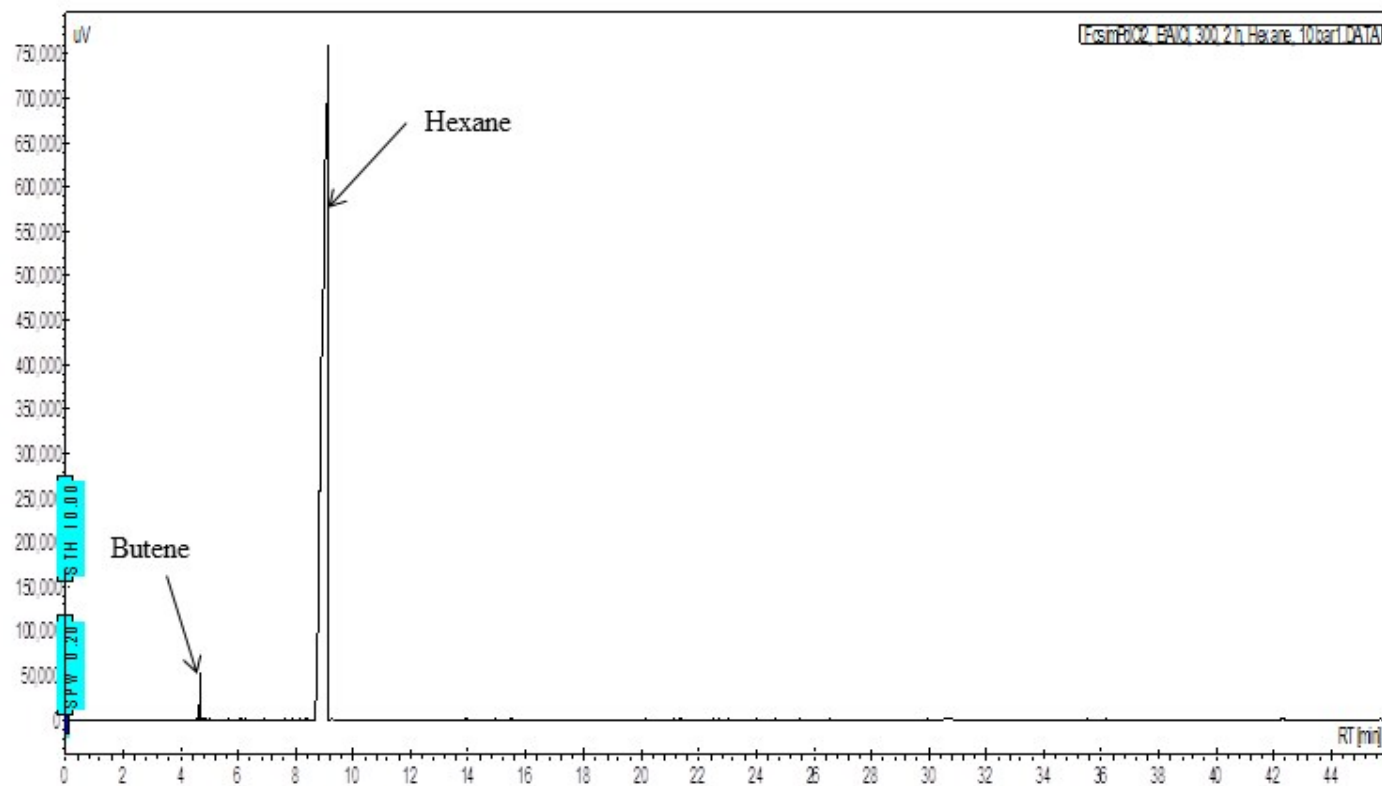

**Figure S1:** A typical GC showing the formation of 1-butene in ethylene oligomerisation reaction catalysed by pre-catalyst **1-4**

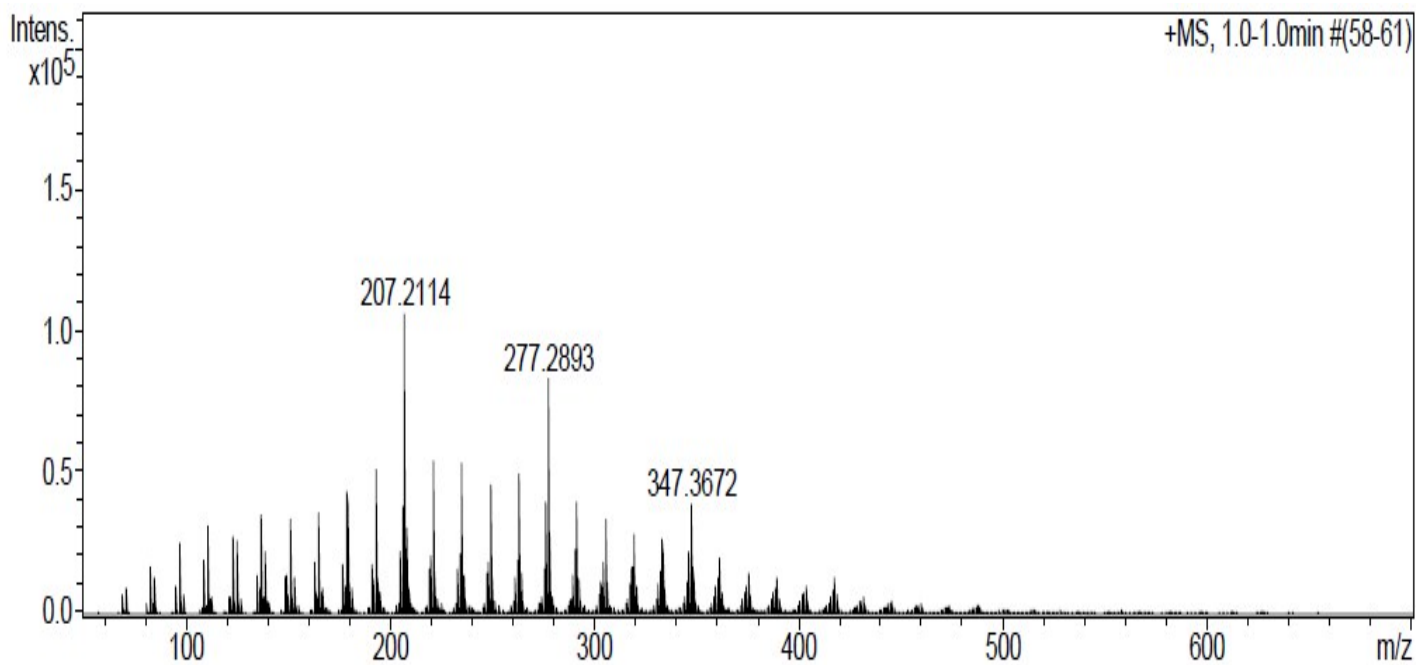

**Figure S2:** A typical APCI spectrum of the oligomer synthesised using pre-catalyst **1**

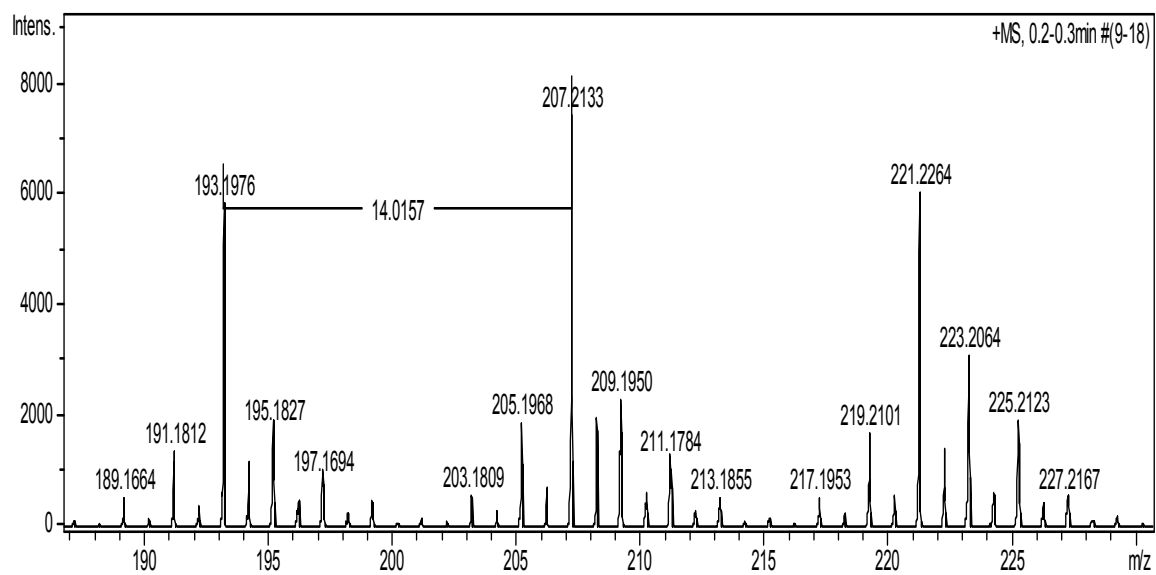

**Figure S3:** A typical APCI spectrum of the oligomer showing isotopic distributions

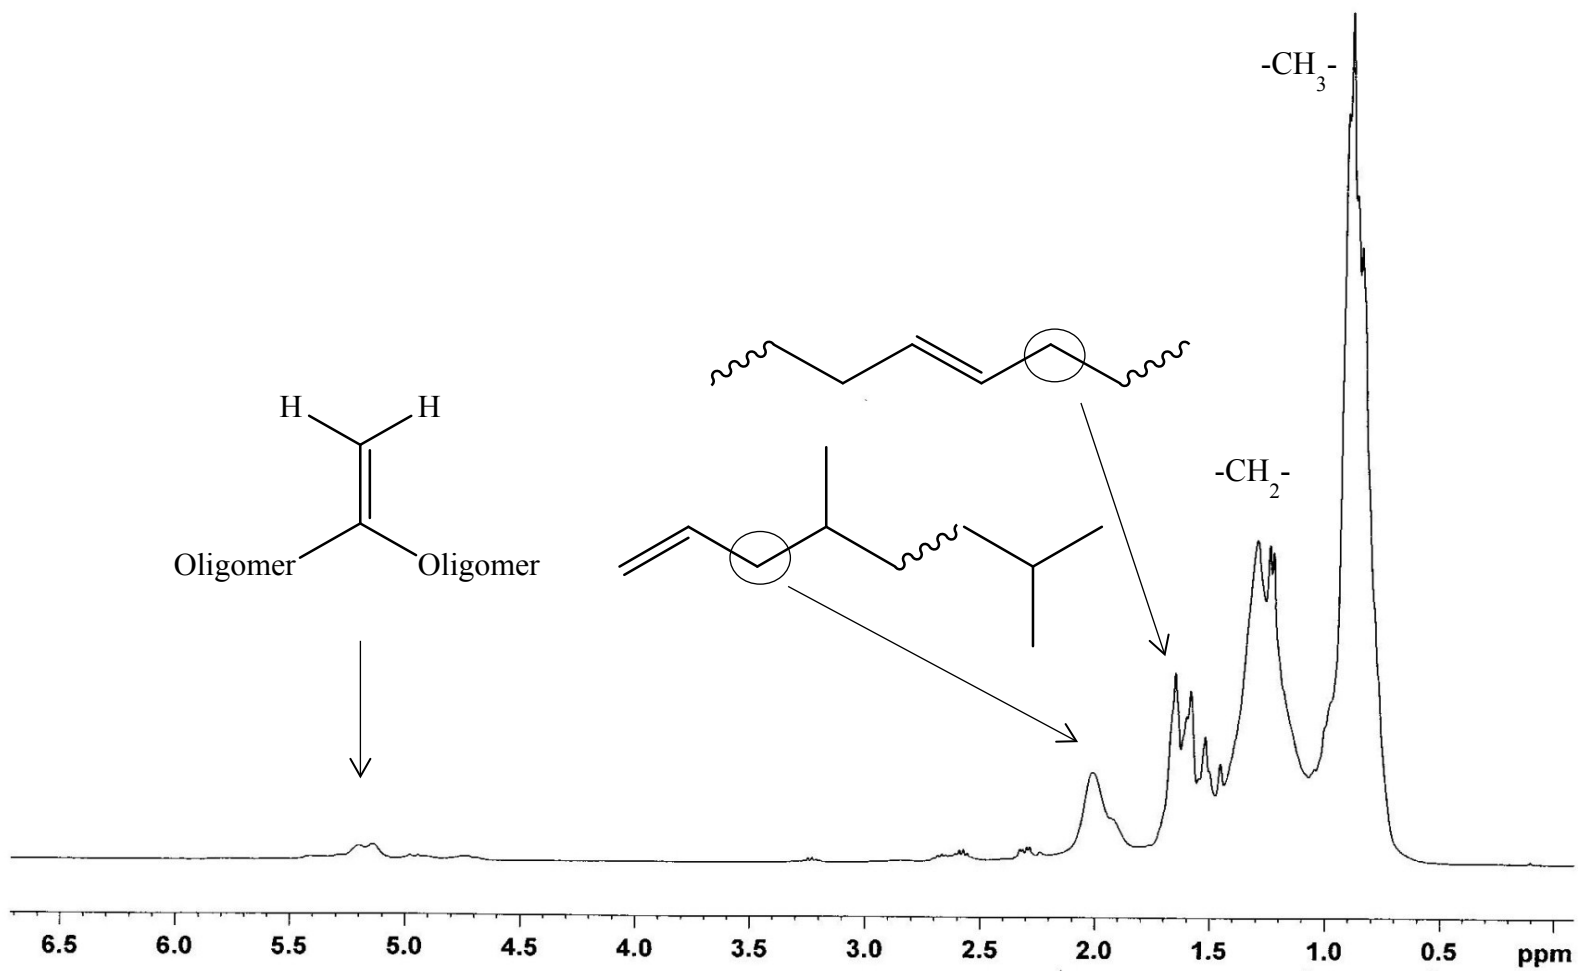

**Figure S4:**  $^1\text{H}$  NMR spectrum of ethylene oligomer produced using pre-catalyst **3** run in  $\text{CDCl}_3$  at 25  $^\circ\text{C}$

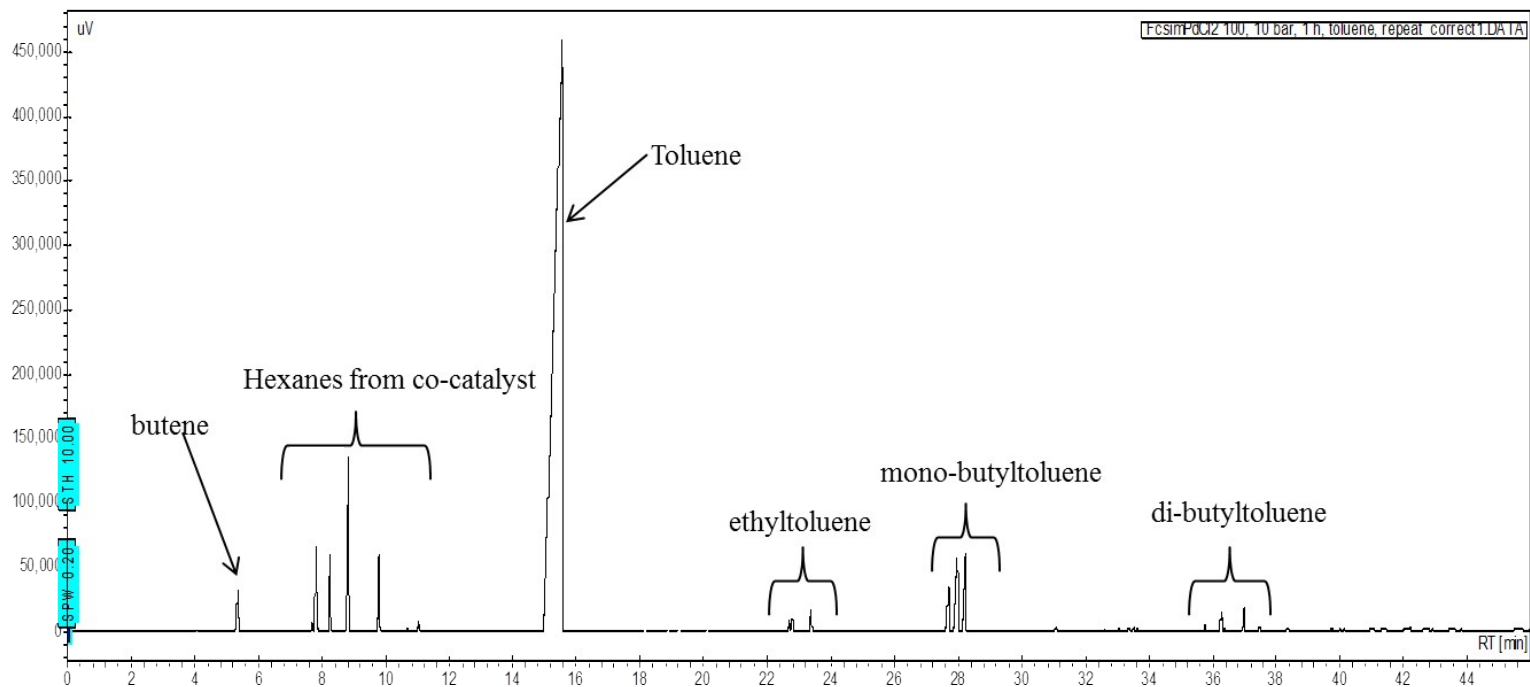

**Figure S5:** GC showing butene and alkylated toluenes produced using pre-catalyst **3**, EtAlCl<sub>2</sub> co-catalyst in toluene solvent, temperature = 25 °C, Al:Ni =200:1, pressure = 10 bar, time = 1 h.

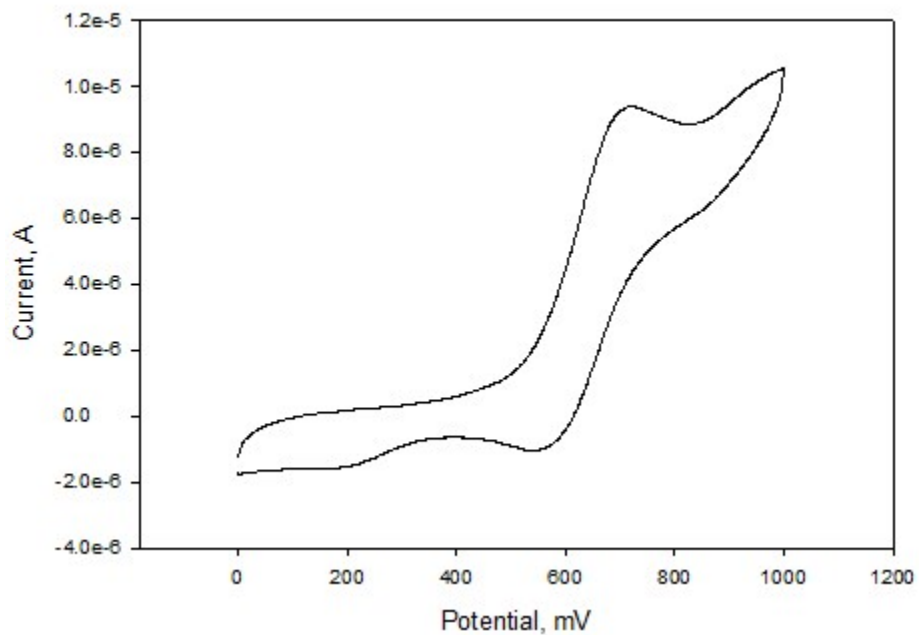

**Figure S6:** Cyclic voltammogram of compound **L7** in DMF, [tBuN][BF<sub>4</sub>] as supporting electrolyte, Ag/AgCl as reference electrode, platinum wire as counter electrode, glassy carbon as working electrode, scan rate of 100 mVs<sup>-1</sup>, temperature 25 °C.

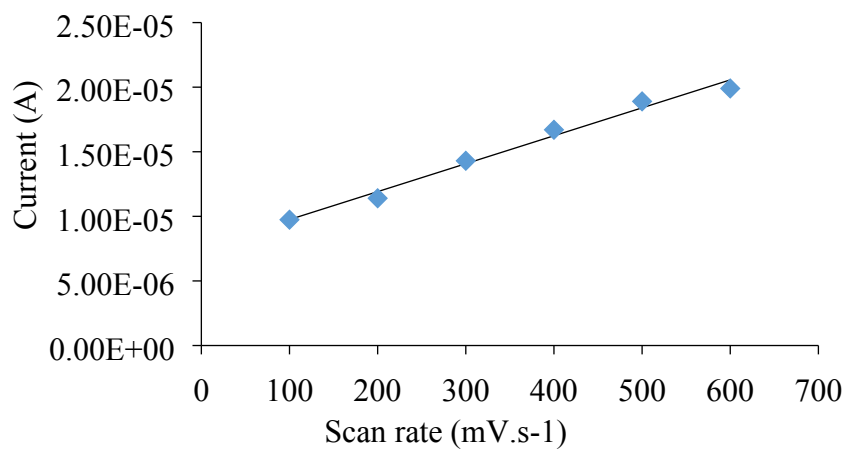

**Figure S7:** A plot of scan rate vs. current for ligand **L2** showing diffusion control mechanism

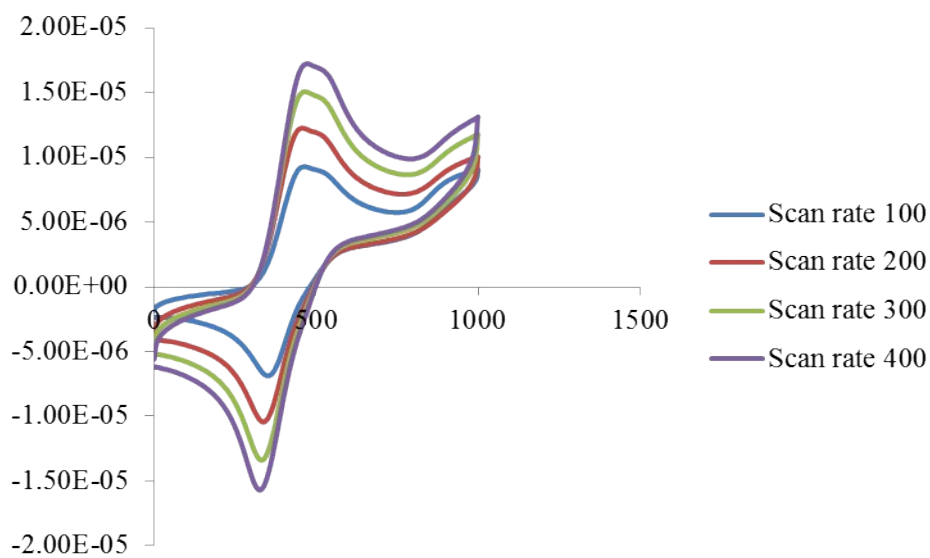

**Figure S8:** Cyclic voltammogram of compound **L2** with different scan rates showing independent of formal oxidation potential with scan rates ( $\text{mV}\cdot\text{s}^{-1}$ ).

**Table S1:** Half wave potentials and catalytic activity of pre-catalysts **1-8**

| Entry | Compound  | $E_{1/2}$ (mV) | Activity ( $\text{kg}\cdot\text{molNi}^{-1}\cdot\text{h}^{-1}$ ) |
|-------|-----------|----------------|------------------------------------------------------------------|
| 1     | <b>1</b>  | 425.0          | 262                                                              |
| 2     | <b>2</b>  | 393.0          | 196                                                              |
| 3     | <b>3</b>  | 436.0          | 210                                                              |
| 4     | <b>4</b>  | 433.0          | 130                                                              |
| 5     | <b>5</b>  | 425.0          | 1 776*                                                           |
| 6     | <b>6</b>  | 393.0          | 1 023*                                                           |
| 7     | <b>7</b>  | 436.0          | 671*                                                             |
| 8     | <b>8</b>  | 433.0          | 578*                                                             |
| 9     | <b>9</b>  | 417.0          | 823*                                                             |
| 10    | <b>10</b> | 424.0          | 710*                                                             |

Activity obtained under the condition; ethylene pressure = 10 bar, Al:Pd = 200, time = 1 h, solvent = hexane. Activity obtained under the condition; ethylene pressure = 10 bar, Al:Ni = 400, time = 1 h, solvent = chlorobenzene.\* Values obtained from reference 13b.

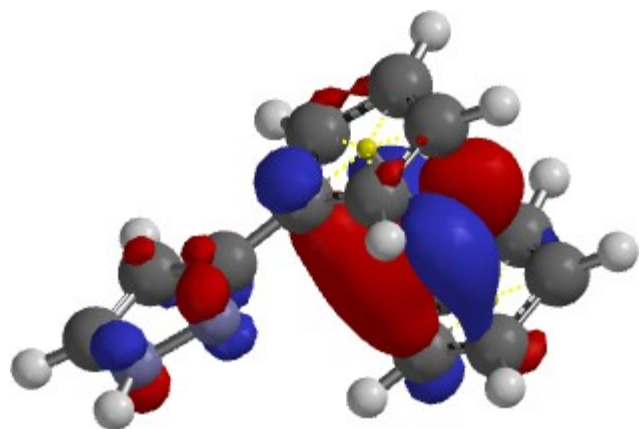

L1 HOMO

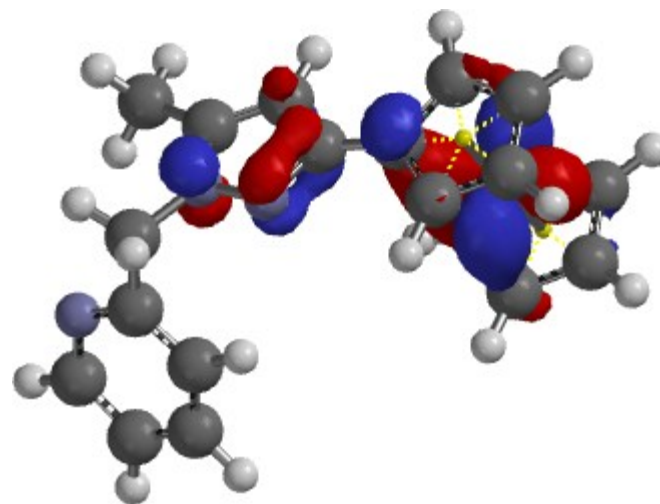

L4 HOMO

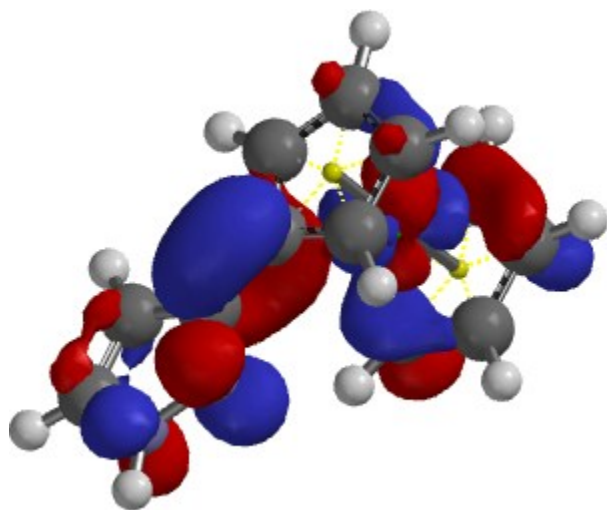

L1 LUMO

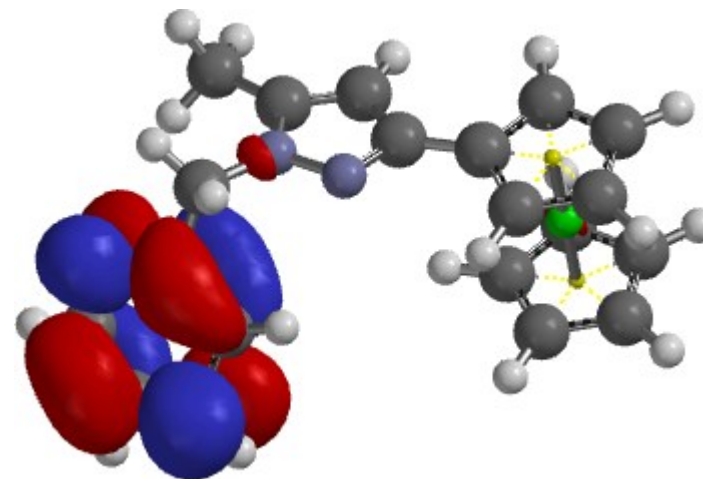

L4 LUMO

**Figure S9:** Shapes of HOMO and LUMO of ligands **L1** and **L4** using B3LYP level of theory and LACVP\* basis set

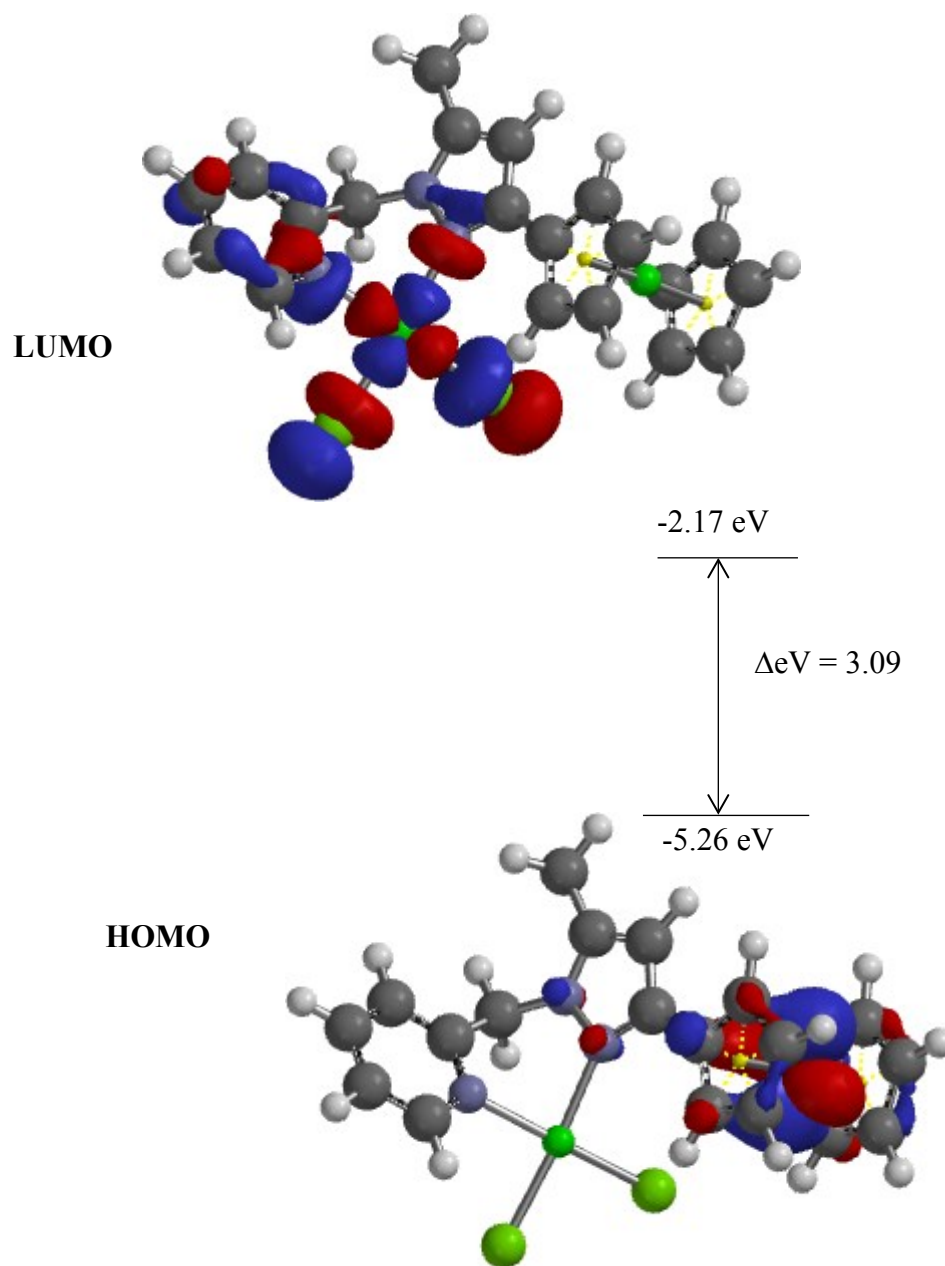

**Figure S10:** Frontier molecular orbitals of palladium complex **2** as determined by density functional theory using B3LYP level of theory and LACVP\* basis set with isovalue of 0.032



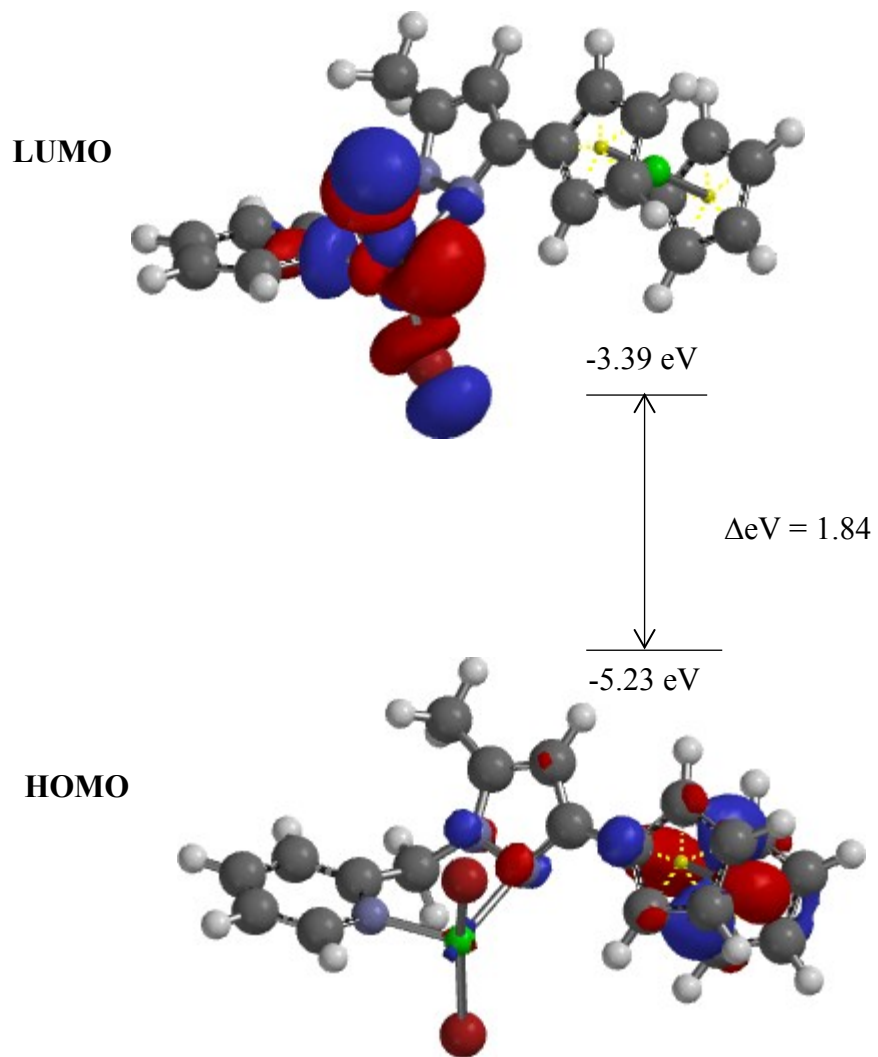

**Figure S11:** Frontier molecular orbitals of nickel complex **6** as determined by density functional theory using B3LYP level of theory and LACVP\* basis set with isovalue of 0.032

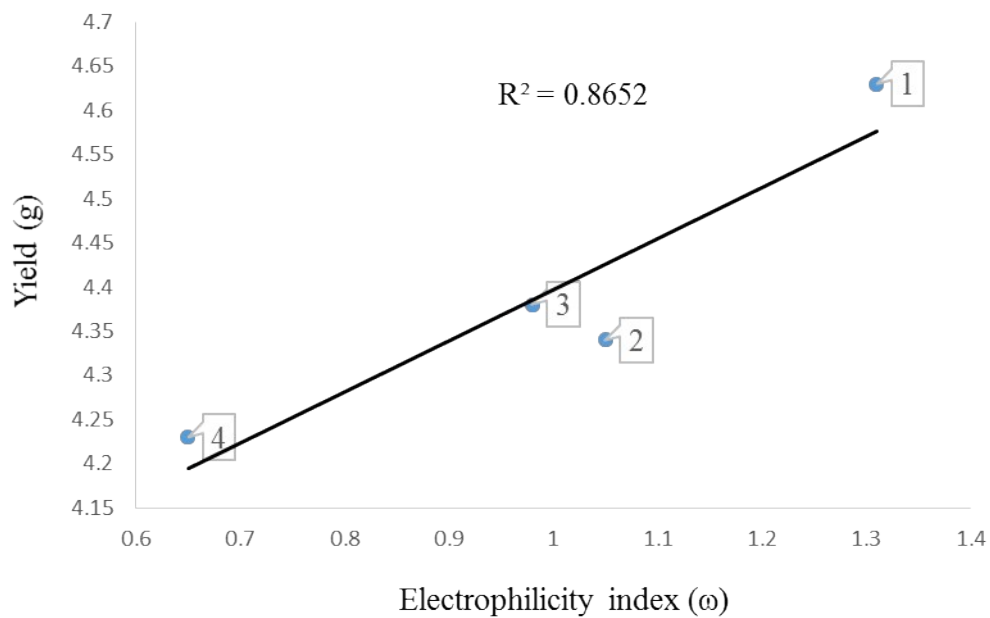

**Figure S12:** A graph of electrophilicity index against yield of oligomers produced using complexes **1-4**

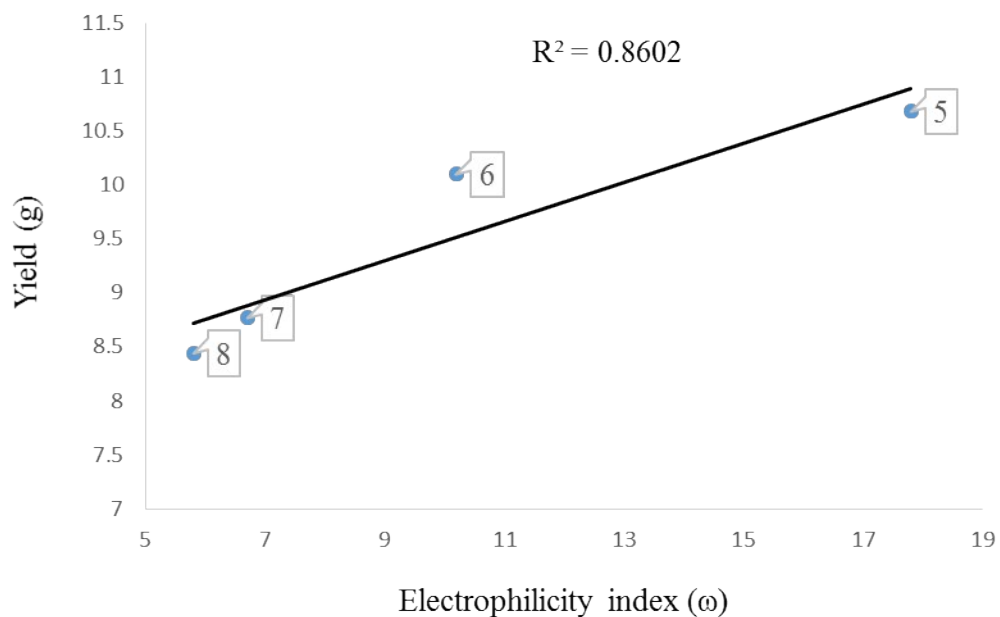

**Figure S13:** A graph of electrophilicity index against yield of oligomers produced using complexes **5-8**

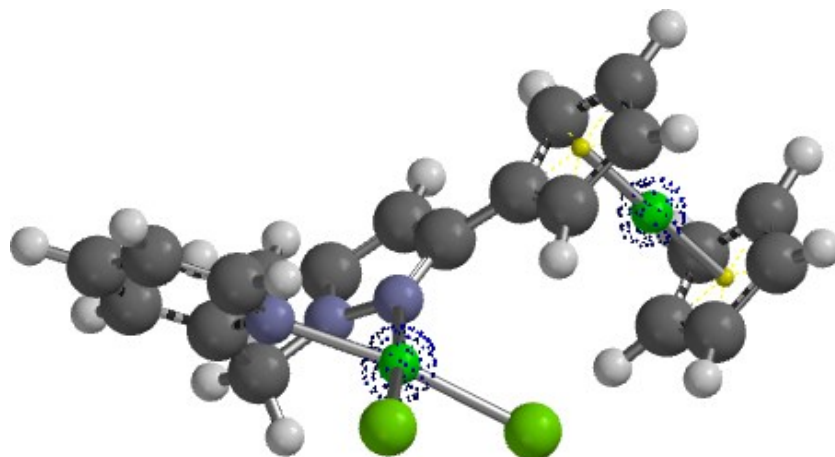

**Figure S14:** Molecular modelling structure of the electron density of nickel in **1** as determined by density functional theory using B3LYP level of theory and LACVP\* basis set with isovalue of 1.0

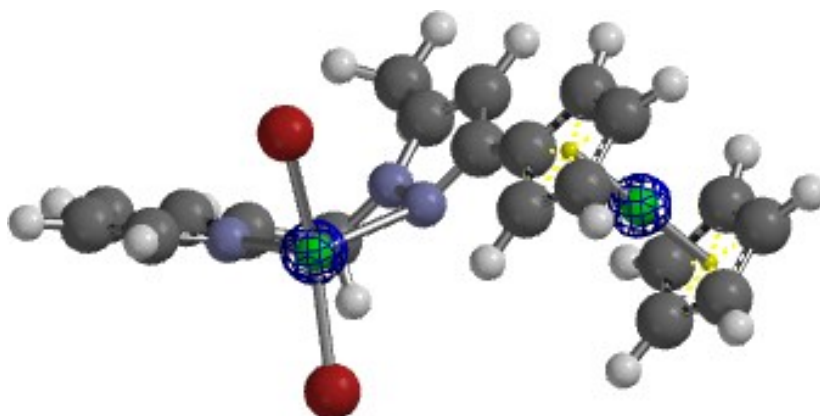

**Figure S15:** Molecular modelling structure of the electron density of nickel in **6** as determined by density functional theory using B3LYP level of theory and LACVP\* basis set with isovalue of 1.0

**Table S2:** Electron densities of palladium in complexes **1-8**

| Complex  | Charge density | Yield (g)* |
|----------|----------------|------------|
| <b>1</b> | 0.98547        | 1.31       |
| <b>2</b> | 0.98409        | 1.05       |
| <b>3</b> | 0.98367        | 0.98       |
| <b>4</b> | 0.98301        | 0.65       |
| <b>5</b> | 1.16578        | 17.80      |
| <b>6</b> | 1.16443        | 10.20      |
| <b>7</b> | 1.16321        | 6.70       |
| <b>8</b> | 1.16232        | 5.80       |

Yield obtained under the condition; ethylene pressure = 10 bar, Al:Pd = 200, time = 1 h, solvent = chlorobenzene. Yield obtained under the condition; ethylene pressure = 10 bar, Al:Ni = 400, time = 1 h, solvent = chlorobenzene.\* Values obtained from reference 13b.
